# Supplementary material
Source: PubMed Central journal article supplement (PMC1455469)

**A**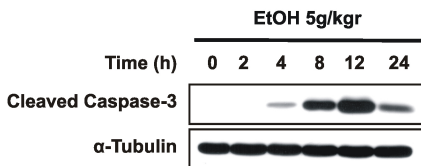**B**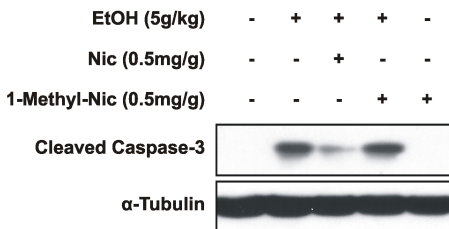**C**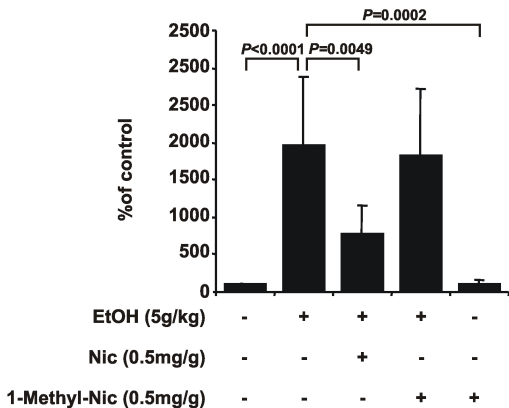

Supplement: pmed.0030101.sg001.pdf [file pmed.0030101.sg001.pdf]
